# Supplementary material
Source: Research Square preprint supplement (doi:10.21203/rs.3.rs-9244312/v1)
Supplement: Supplementary file 1 [file a35c3fb5410264a233ab2f84.docx]

Table 1: Demographic and Clinical Characteristics of the Patients

| Variables | | | Diagnosis | | |
| --- | --- | --- | --- | --- | --- |
| Peripheral | Central | p-value |
| Total- n (%) | | | 236 (79.2) | 62 (20.8) | - |
| Demographics and vital signs | Age (year)- mean±SD | | 50.28±16.31 | 57.97±14.23 | <0.001* |
| Gender- n (%) | Male | 88 (68.21) | 41 (31.79) | <0.001‡ |
| Female | 148 (87.57) | 21 (12.43) |
| Diabetes Mellitus- n (%) |  | 36 (70.58) | 15 (29.22) | 0.096‡ |
| Hypertension- n (%) |  | 57 (70.37) | 24 (29.63) | 0.022‡ |
| Chronic Obstructive Pulmonary Disease- n (%) |  | 3 (60) | 2 (40) | 0.279§ |
| Cerebrovascular Disease- n (%) |  | 5 (41.66) | 7 (58.34) | 0.004§ |
| Chronic Kidney Failure- n (%) |  | 0 (0) | 1 (100) | 0.208§ |
| Chronic Heart Failure- n (%) |  | 2 (66.66) | 1 (33.34) | 0.505§ |
| Malignancy |  | 2 (66.66) | 1 (33.34) | 0.505§ |
| Systolic Blood Pressure (mmHg)- mean ± SD |  | 135.69±20.72 | 146.52±22.71 | 0.001* |
| Diastolic Blood Pressure (mmHg)- mean ± SD |  | 76.92±13.47 | 81.84±15.04 | 0.001* |
| Heart Rate (/min)- med (25-75%) |  | 86 (78-95) | 88 (78-95) | 0.663† |
| SpO2 (%) |  | 99 (97-99) | 99 (96-99) | 0.905† |
| Symptoms | Lightheadedness- n (%) |  | 123(70.28) | 52(29.72) | <0.001‡ |
| Nausea- n (%) |  | 107 (76.97) | 32 (23.03) | 0.378‡ |
| Vomiting- n (%) |  | 107 (76.97) | 32 (23.03) | 0.378‡ |
| Headache- n (%) |  | 43 (75.43) | 14 (24.57) | 0.437‡ |
| HINTS-Plus components | Head impulse- n (%) | Peripheral | 206 (91.96) | 18 (8.04) | <0.001‡ |
| Central | 30 (40.54) | 44 (59.46) |
| Nystagmus- n (%)** | Peripheral | 230 (85.5) | 39 (14.5) | <0.001‡ |
| Central | 6 (20.68) | 23 (70.32) |
| Test of skew- n (%) | Peripheral | 219 (84.88) | 39 (15.12) | <0.001‡ |
| Central | 17 (42.5) | 23 (57.5) |
| Hearing loss- n (%) | Peripheral | 231 (79.65) | 59 (20.35) | 0.370§ |
| Central | 5 (62.5) | 3 (37.5) |
| HINTS Plus test | | Peripheral | 195 (94.2) | 12 (5.8) | <0.001‡ |
| Central | 41 (45.05) | 50 (54.95) |
| HINTS test | | Peripheral | 198 (93.83) | 13 (6.17) | <0.001‡ |
| Central | 38 (43.67) | 49 (56.33) |
| * Student T test  ‡ Pearson Chi-Square test  § Fisher's Exact test  † Mann Whitney U test  **Peripheral: Horizontal nystagmus. Central: Vertical or rotatory nystagmus. | | | | | |

Table 2: Diagnostic Performance Metrics of the HINTS and HINTS Plus Tests

| Variables | Sensitivity (95% CI) | Specificity (95% CI) | +LR (95% CI) | -LR (95% CI) | PPV (95% CI) | NPV (95% CI) | Accuracy (95% CI) |
| --- | --- | --- | --- | --- | --- | --- | --- |
| HINTS-Plus | 80.65% (68.63-89.58) | 82.63% (77.18-87.24) | 4.64 (3.42-6.29) | 0.23 (0.14-0.38) | 54.95% (47.37-62.3) | 94.2% (90.69-96.44) | 82.21% (77.39-86.38) |
| Head impulse | 70.97% (58.05-81.8) | 87.29% (82.35-91.26) | 5.58 (3.85-8.08) | 0.33 (0.22-0.49) | 59.46% (50.32-67.99) | 91.96% (88.55-94.43) | 83.89% (79.22-87.88) |
| Nystagmus | 37.1% (25.16-50.31) | 97.46% (94.55-99.06) | 14.59 (6.21-34.27) | 0.65 (0.54-0.79) | 79.31% (62.01-90) | 85.5% (82.95-87.73) | 84.9% (80.32-88.77) |
| Test of skew | 37.1% (25.16-50.31) | 92.80% (88.72-95.75) | 5.15 (2.94-9.03) | 0.68 (0.56-0.83) | 57.5% (43.57-70.34) | 84.88% (82.22-87.21) | 81.21% (76.3-85.48) |
| Hearing loss | 4.84%  (1.01-13.5) | 97.88% (95.13-99.31) | 2.28 (0.56-9.28) | 0.97 (0.91-1.03) | 37.5% (12.85-70.95) | 79.66% (78.68-80.6) | 78.52% (73.42-83.05) |
| HINTS | 79.03% (66.82-88.34) | 83.9% (78.58-88.35) | 4.91 (3.57-6.75) | 0.25 (0.15-0.41) | 56.32% (48.4-63.93) | 93.84% (90.35-96.12) | 82.89% (78.12-86.98) |

Table 3: Characteristics and Outcomes of False-Negative Patients

| Age | Gender | Diagnosis | Unit/Outcome |
| --- | --- | --- | --- |
| 59 | Female | Ischemic Stroke | Ward Admission/Discharge |
| 67 | Female | Hemorrhagic Stroke | Intensive Care Unit Admission/Discharge |
| 46 | Male | Hemorrhagic Stroke | Ward Admission/Discharge |
| 53 | Male | Hemorrhagic Stroke | Ward Admission/Discharge |
| 59 | Male | Ischemic Stroke | Ward Admission/Discharge |
| 62 | Male | Ischemic Stroke | Ward Admission/Discharge |
| 67 | Female | Hemorrhagic Stroke | Intensive Care Unit Admission/Discharge |
| 37 | Female | Ischemic Stroke | Ward Admission/Discharge |
| 78 | Female | Ischemic Stroke | Ward Admission/Discharge |
| 60 | Male | Ischemic Stroke | Ward Admission/Discharge |
| 43 | Male | Ischemic Stroke | Ward Admission/Discharge |
| 43 | Female | Ischemic Stroke | Ward Admission/Discharge |
